# Supplementary material
Source: publisher figshare collection journal article supplement (https://acs.figshare.com/ndownloader/files/4027909)
Supplement: Supplementary file 1 [file 4027909]

# Supporting information

## Surface Self-assembled PEGylation of Fluoro-based PVDF Membranes via Hydrophobic-Driven Copolymer Anchoring for Ultra-Stable Biofouling Resistance

Nien-Jung Lin<sup>a</sup>, Hui-Shan Yang<sup>a</sup>, Yung Chang<sup>a,\*</sup>, Kuo-Lun Tung<sup>a,b,\*</sup>, Wei-Hao Chen<sup>a</sup>,  
Hui-Wen Cheng<sup>a</sup>, Sheng-Wen Hsiao<sup>a</sup>, Pierre Aimar<sup>c</sup>, Kazuo Yamamoto<sup>d</sup>, Juin-Yih Lai<sup>a</sup>

<sup>a</sup>*R&D Center for Membrane Technology and Department of Chemical Engineering,  
Chung Yuan Christian University, Jhong-Li, Taoyuan 320, Taiwan*

<sup>b</sup>*Department of Chemical Engineering, National Taiwan University, Taipei 106,  
Taiwan*

<sup>c</sup>*LGC, Université Paul Sabatier, Toulouse cedex 9, 31062, France*

<sup>d</sup>*Department of Urban Engineering, Environmental Science Center, The University  
of Tokyo, 7-3-1 Hongo, Bunkyo-ku, Tokyo, 113-8656, Japan*

---

\* To whom correspondence should be addressed. E-mail: [ychang@cycu.edu.tw](mailto:ychang@cycu.edu.tw)

[kuolun@ntu.edu.tw](mailto:kuolun@ntu.edu.tw)

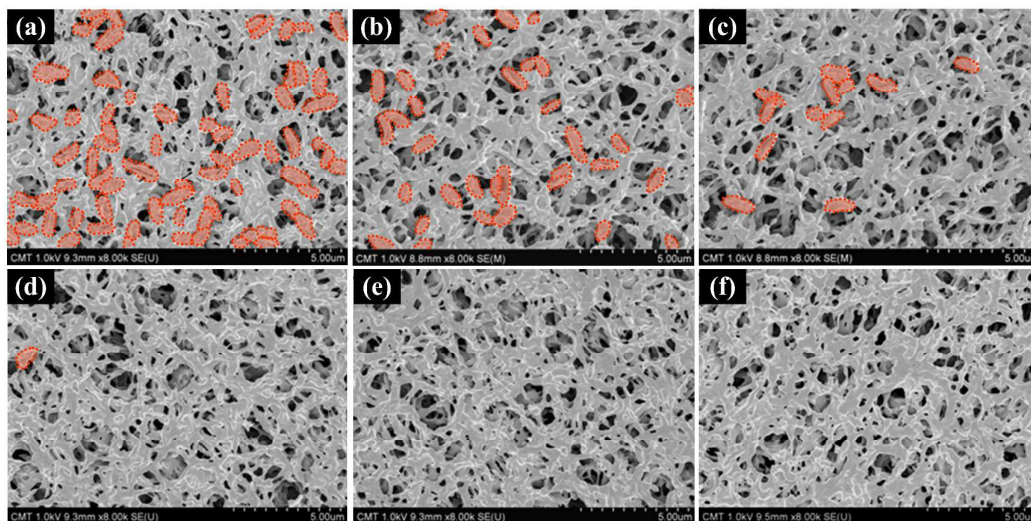

**Figure S1** *S. epidermidis* attachment on PS<sub>55</sub>PEGMA<sub>30</sub> coated PVDF membranes with  $C_{PS-b-PEGMA}$  of (a) 0; (b) 0.01; (c) 0.05; (d) 0.1; (e) 0.5; (f) 10 mg/mL after 24 hours of culture at 37 °C.

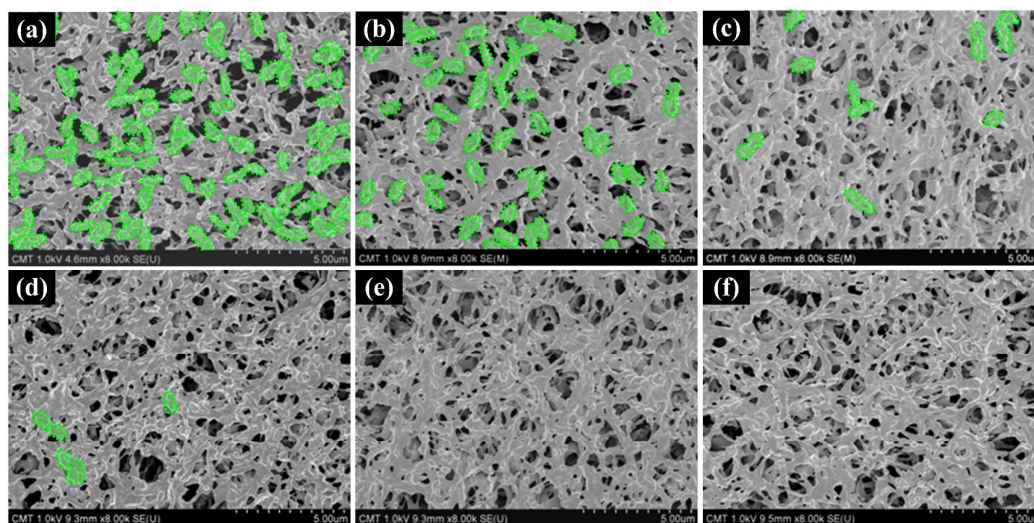

**Figure S2** *E. coli* attachment on PS<sub>55</sub>PEGMA<sub>30</sub> coated PVDF membranes with  $C_{PS-b-PEGMA}$  of (a) 0; (b) 0.01; (c) 0.05; (d) 0.1; (e) 0.5; (f) 10 mg/mL after 24 hours of culture at 37 °C.
